# Supplementary material
Source: PubMed Central journal article supplement (PMC5288825)
Supplement: AEM.03035-16_zam999117670s1.pdf [file AEM.03035-16_zam999117670s1.pdf]

SUPPLEMENTAL FIGURES AND TABLES

**A *Rhizobiales*-specific unipolar polysaccharide adhesin contributes to *Rhodopseudomonas palustris* biofilm formation across diverse photoheterotrophic conditions**

Ryan K. Fritts, Breah LaSarre, Ari M. Stoner, Amanda L. Posto, and James B. McKinlay

Department of Biology, Indiana University, Bloomington, Indiana, USA

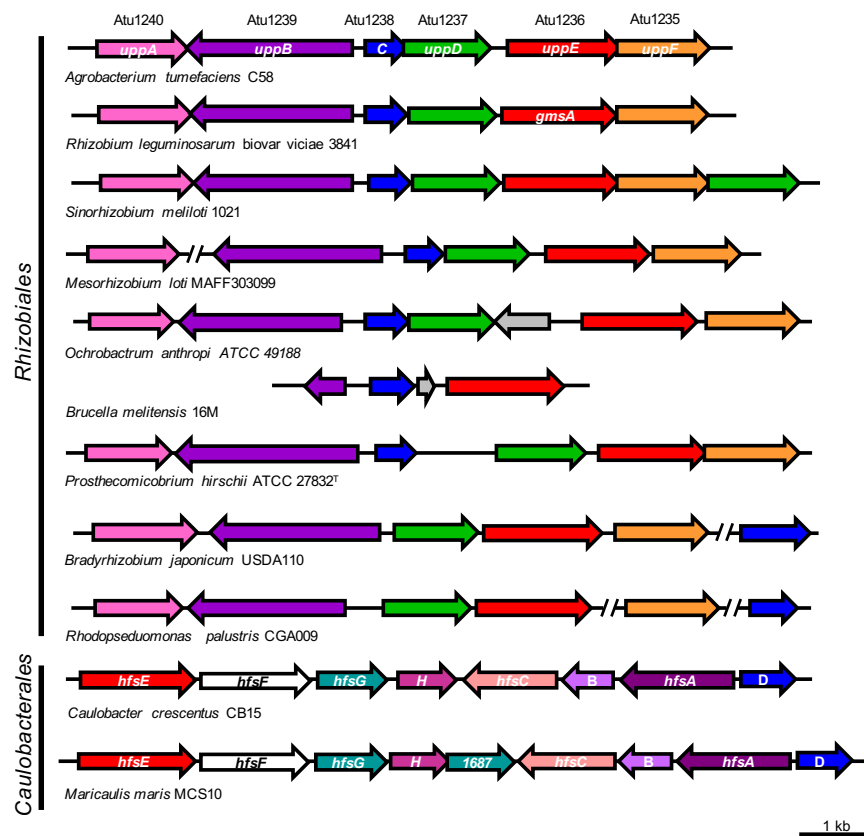

**FIG S1. Conservation and synteny of core *upp* and *hfs* gene clusters.** Genes (arrows) are colored based on predicted homology and function such that genes of the same color are putative homologs. Genes without a predicted role in polysaccharide biosynthesis and export are shown in grey. Query cover, % Identities/Positives, and E values for *hfs* and *upp* homologs can be found in Dataset S1 and S2, respectively.

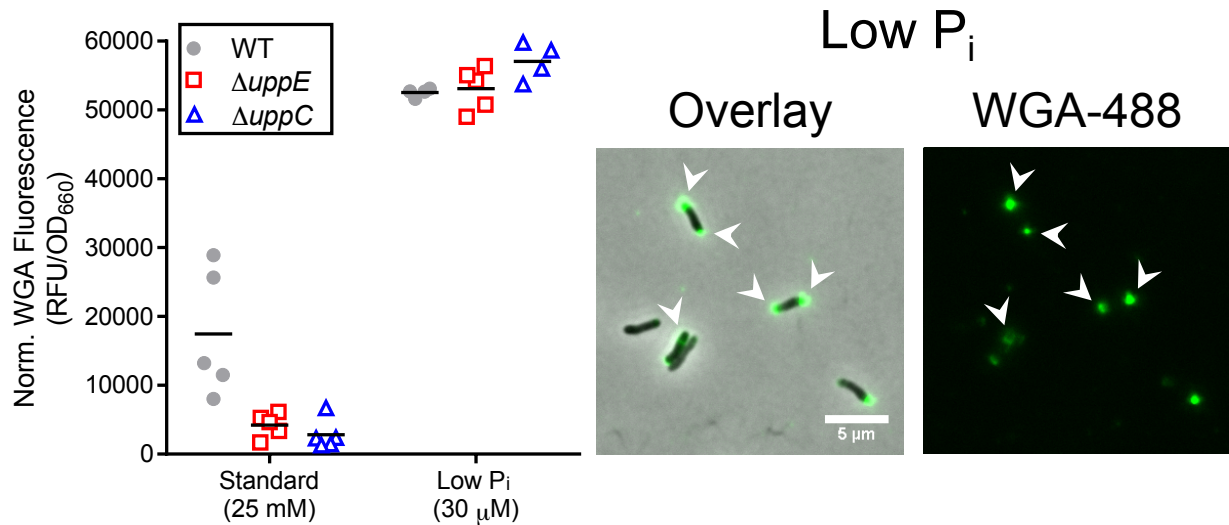

**FIG S2. Increased total WGA-488 fluorescence and bipolar and cell body staining of *R. palustris* grown in low P<sub>i</sub> photoheterotrophic conditions.** (A) Normalized total WGA-488 fluorescence from batch UPP quantification via total WGA-fluorescence assay following 3 d of growth under indicated photoheterotrophic conditions. Individual values for biological replicates (n=4-5) are shown with lines indicating the means. (B) Epifluorescence microscopy of WT *R. palustris* cells stained with WGA-488 after 2 days of growth in low P<sub>i</sub> photoheterotrophic conditions. Arrowheads indicate staining of bipolar or cell body regions. Scale bar, 5 μm.

**TABLE S1. Putative orthologs of UppABCDEF in *C. crescentus* CB15 identified by reciprocal best hits approach**

| <i>Agrobacterium tumefaciens</i><br>C58 (AE007869.2) query<br>sequence | TBLASTN best hit in <i>Caulobacter crescentus</i><br>CB15 (AE005673.1) |                |                       |          | BLASTX reciprocal best hit in <i>Agrobacterium</i><br><i>tumefaciens</i> C58 ((AE007869.2) |                |                       |          |
|------------------------------------------------------------------------|------------------------------------------------------------------------|----------------|-----------------------|----------|--------------------------------------------------------------------------------------------|----------------|-----------------------|----------|
|                                                                        | locus tag                                                              | Query<br>cover | % Ident/<br>Positives | E value  | locus tag                                                                                  | Query<br>cover | % Ident/<br>Positives | E value  |
| Atu1240/UppA<br>(NP_354252.1, 409 aa)                                  | No matches                                                             |                |                       |          | N/A                                                                                        |                |                       |          |
| Atu1239/UppB<br>(NP_354251.1, 753 aa)                                  | CC_0164                                                                | 51%            | 30%/51%               | 3.00E-37 | Atu3556                                                                                    | 99%            | 29%/52%               | 1.00E-41 |
| Atu1238/UppC<br>(NP_354250.1, 190 aa)                                  | CC_0169                                                                | 86%            | 39%/61%               | 5.00E-34 | Atu1238/<br>UppC                                                                           | 100%           | 39%/61%               | 8.00E-38 |
| Atu1237/UppD<br>(NP_354249.1, 393 aa)                                  | CC_3345                                                                | 46%            | 24%/42%               | 4.00E-03 | Atu2297                                                                                    | 92%            | 53%/65%               | 2.00E-49 |
| Atu1236/UppE<br>(NP_354248.2, 517 aa)                                  | CC_2425/<br><i>hfsE</i>                                                | 70%            | 38%/57%               | 1.00E-71 | Atu1236/<br>UppE                                                                           | 89%            | 41%/60%               | 6.00E-68 |
| Atu1235/UppF<br>(NP_354247.1, 413 aa)                                  | CC_1446                                                                | 11%            | 31%/48%               | 2.10     | Atu3137                                                                                    | 57%;           | 39%/67%               | 8.00E-04 |
| BLASTP Alignment of putative homologs<br>UppC & HfsD (AAK24403.1)      |                                                                        | 63%            | 33%/46%               | 4.00E-13 |                                                                                            |                |                       |          |

**TABLE S2. Putative orthologs of UppABCDEF in *R. palustris* CGA009 identified by reciprocal best hits approach**

| <i>Agrobacterium tumefaciens</i><br>C58 (AE007869.2) query<br>sequence | TBLASTN best hit in <i>Rhodospseudomonas</i><br><i>palustris</i> CGA009 (BX571963.1) |                |                       |           | BLASTX reciprocal best hit in <i>Agrobacterium</i><br><i>tumefaciens</i> C58 (NC_003062.2) |             |                       |           |
|------------------------------------------------------------------------|--------------------------------------------------------------------------------------|----------------|-----------------------|-----------|--------------------------------------------------------------------------------------------|-------------|-----------------------|-----------|
|                                                                        | locus tag                                                                            | Query<br>cover | % Ident/<br>Positives | E value   | locus tag                                                                                  | Query cover | % Ident/<br>Positives | E value   |
| Atu1240/UppA<br>(NP_354252.1, 409 aa)                                  | RPA2753                                                                              | 97%            | 28%/44%               | 4.00E-24  | Atu1240/<br>UppA                                                                           | 100%        | 28%/44%               | 3.00E-32  |
| Atu1239/UppB<br>(NP_354251.1, 753 aa)                                  | RPA2752                                                                              | 53%            | 39%/60%               | 5.00E-74  | Atu1239/<br>UppB                                                                           | 100%        | 39%/60%               | 3.00E-85  |
| Atu1238/UppC<br>(NP_354250.1, 190 aa)                                  | RPA4833                                                                              | 78%            | 52%/72%               | 6.00E-48  | Atu1238/<br>UppC                                                                           | 100%        | 52%/72%               | 1.00E-53  |
| Atu1237/UppD<br>(NP_354249.1, 393 aa)                                  | RPA2751                                                                              | 79%            | 40%/56%               | 5.00E-69  | Atu1237/<br>UppD                                                                           | 100%        | 40%/56%               | 7.00E-68  |
| Atu1236/UppE<br>(NP_354248.2, 517 aa)                                  | RPA2750                                                                              | 94%            | 49%/62%               | 5.00E-143 | Atu1236/<br>UppE                                                                           | 100%        | 49%/62%               | 6.00E-148 |
| Atu1235/UppF<br>(NP_354247.1, 413 aa)                                  | RPA4581                                                                              | 76%            | 38%/57%               | 2.00E-47  | Atu1235/<br>UppF                                                                           | 100%        | 38%/57%               | 2.00E-42  |

**TABLE S3. Statistical analyses for comparing relative biofilm formation by WT across growth conditions in Fig. 3A**

| WT only                              | Post-hoc test |              |                          |                         |                            |                                   | unpaired, two-tailed t test (Welch's correction) | Consensus   |
|--------------------------------------|---------------|--------------|--------------------------|-------------------------|----------------------------|-----------------------------------|--------------------------------------------------|-------------|
|                                      | Dunnett's     | Holm-Sidak's | Uncorrected Fisher's LSD | Dunnett's w/o sea salts | Holm-Sidak's w/o sea salts | Dunnett's on log transformed data |                                                  |             |
| Standard vs low Pi                   | 0.0686        | 0.0414       | 0.0209                   | < 0.0001                | < 0.0001                   | < 0.0001                          | < 0.0001                                         | significant |
| Standard vs N <sub>2</sub> -fixation | 0.9399        | 0.5633       | 0.5633                   | 0.1685                  | 0.0699                     | < 0.0001                          | < 0.0001                                         | ns          |
| Standard vs 1.5% sea salts           | < 0.0001      | < 0.0001     | < 0.0001                 | N/A                     | N/A                        | < 0.0001                          | < 0.0001                                         | significant |
| Standard vs chemoheterotrophy        | 0.0002        | 0.0001       | < 0.0001                 | < 0.0001                | < 0.0001                   | < 0.0001                          | < 0.0001                                         | significant |

Due to violation of the assumption of homogeneity of variances when performing a Two-way ANOVA for the data plotted in Fig. 3A, multiple statistical analyses were performed and compared to reach a consensus for interpreting this data set.

**TABLE S4.  $\alpha$ -proteobacterial species used for phylogenetic analysis**

| <b>Alphaproteobacterial species in phylogenetic analysis</b> |                                       |
|--------------------------------------------------------------|---------------------------------------|
| <b>Species</b>                                               | <b>GenBank accession number/taxid</b> |
| <i>Agrobacterium tumefaciens</i> C58                         | AE007869.2/176299                     |
| <i>Rhodopseudomonas palustris</i> CGA009                     | BX571963.1/258594                     |
| <i>Rhizobium leguminosarum</i> bv. <i>viciae</i> 3841        | CP007045.1/216596                     |
| <i>Sinorhizobium meliloti</i> 1021                           | AL591688.1/266834                     |
| <i>Mesorhizobium loti</i> MAFF303099                         | BA000012.4/266835                     |
| <i>Bradyrhizobium japonicum</i> USDA 110                     | BA000040.2/224911                     |
| <i>Bradyrhizobium</i> sp. BTAi1                              | LN901633.1/288000                     |
| <i>Rhodopseudomonas palustris</i> BisA53                     | CP000463.1/316055                     |
| <i>Nitrobacter winogradskyi</i> Nb-255                       | CP000115.1/323098                     |
| <i>Nitrobacter hamburgensis</i> X14                          | CP000319.1/323097                     |
| <i>Ochrobactrum anthropi</i> ATCC 49188                      | CP000758.1/439375                     |
| <i>Brucella melitensis</i> 16M                               | AE008917.1/224914                     |
| <i>Brucella suis</i> 1330                                    | AE014291.4/204722                     |
| <i>Bartonella henselae</i> Houston-1                         | BX897699.1/283166                     |
| <i>Bartonella bacilliformis</i> KC583                        | CP000524.1/360095                     |
| <i>Xanthobacter autotrophicus</i> Py2                        | CP000781.1/78245                      |
| <i>Azorhizobium caulinodans</i> ORS 571                      | AP009384.1/438753                     |
| <i>Methylobacterium extorquens</i> AM1                       | CP001510.1/272630                     |
| <i>Prosthecomicrobium hirschi</i> ATCC 27832T                | LJYW00000000.1/665126                 |
| <i>Rhodomicrobium vannielii</i> ATCC 17100                   | CP002292.1/648757                     |
| <i>Hyphomicrobium denitrificans</i> 1NES1                    | CP002083.1/670307                     |
| <i>Parvibaculum lavamentivorans</i> DS-1                     | CP000774.1/402881                     |
| <i>Caulobacter crescentus</i> CB15                           | AE005673.1/190650                     |
| <i>Maricaulis maris</i> MCS10                                | CP000449.1/394221                     |
| <i>Phaeobacter inhibens</i> DSM 17395                        | CP002976.1/391619                     |
| <i>Ruegeria pomeroyi</i> DSS-3                               | NC_003911.12/246200                   |

The 26  $\alpha$ -proteobacterial species in the phylogeny in Fig. 4 and their corresponding GenBank accession number and taxid for analysis of the conservation and distribution of core *upp* gene clusters across the order *Rhizobiales*.
